# Supplementary material for: Combined experimental and theoretical investigations on the encapsulation of nickel(ii)tet-a complex in zeolite Y and its photocatalytic activity
Source: Royal Society of Chemistry journal article supplement (doi:10.1039/c6ra15179e), 2016-01-01
Supplement: c6ra15179e1.pdf [file c6ra15179e1.pdf]

### Supplementary Information

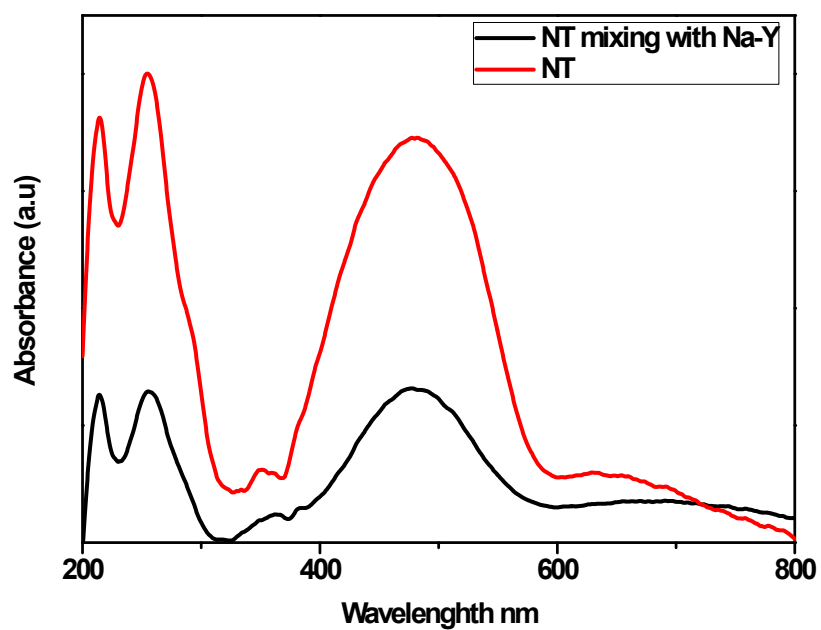

**Figure S.1** DRS UV-Vis spectra of the Physical mixture of Nickel(II)tet-a complex with Na-zeolite Y, Nickel(II)tet-a complex (NT)

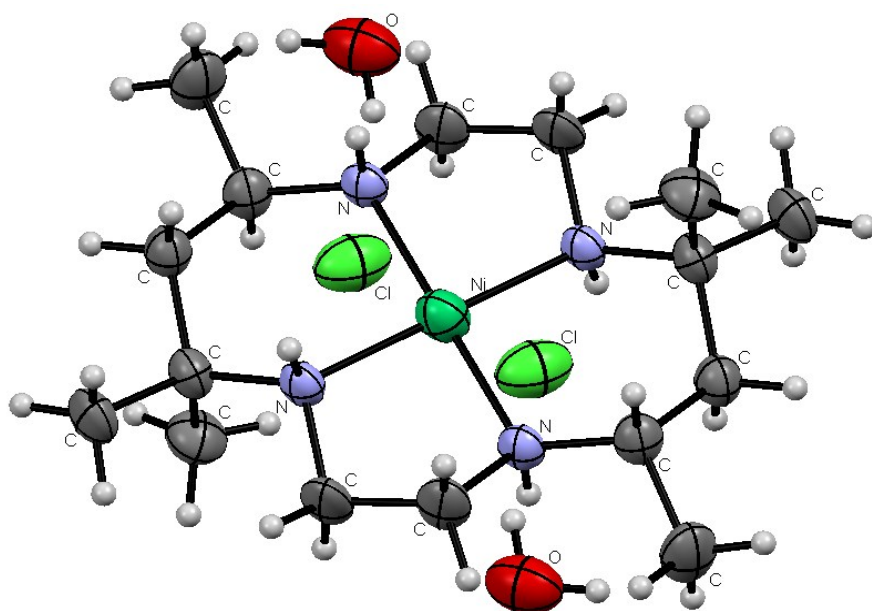

**Figure S.2** ORTEP diagram of 5,7,7,12,14,14-hexamethyl-1,4,8,11-tetraazacyclotetradecane [Tet-a] Nickel(II) complex (NT)

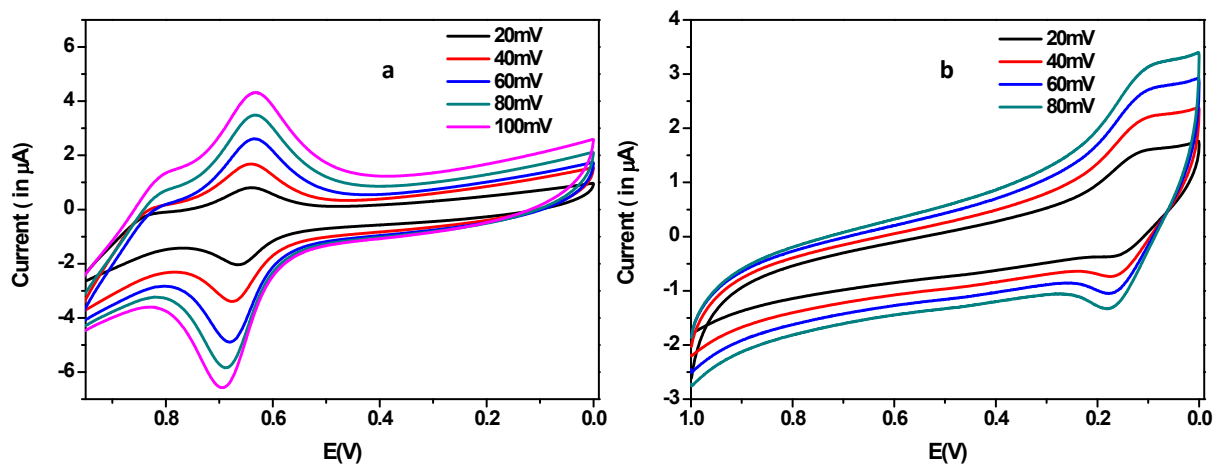

**Figure S.3** Cyclic voltammogram of the (a) Nickel(II)tet-a complex (NT), (b) Nickel(II)tet-a complex in Y (NTY) at different scanning rate mV/s.

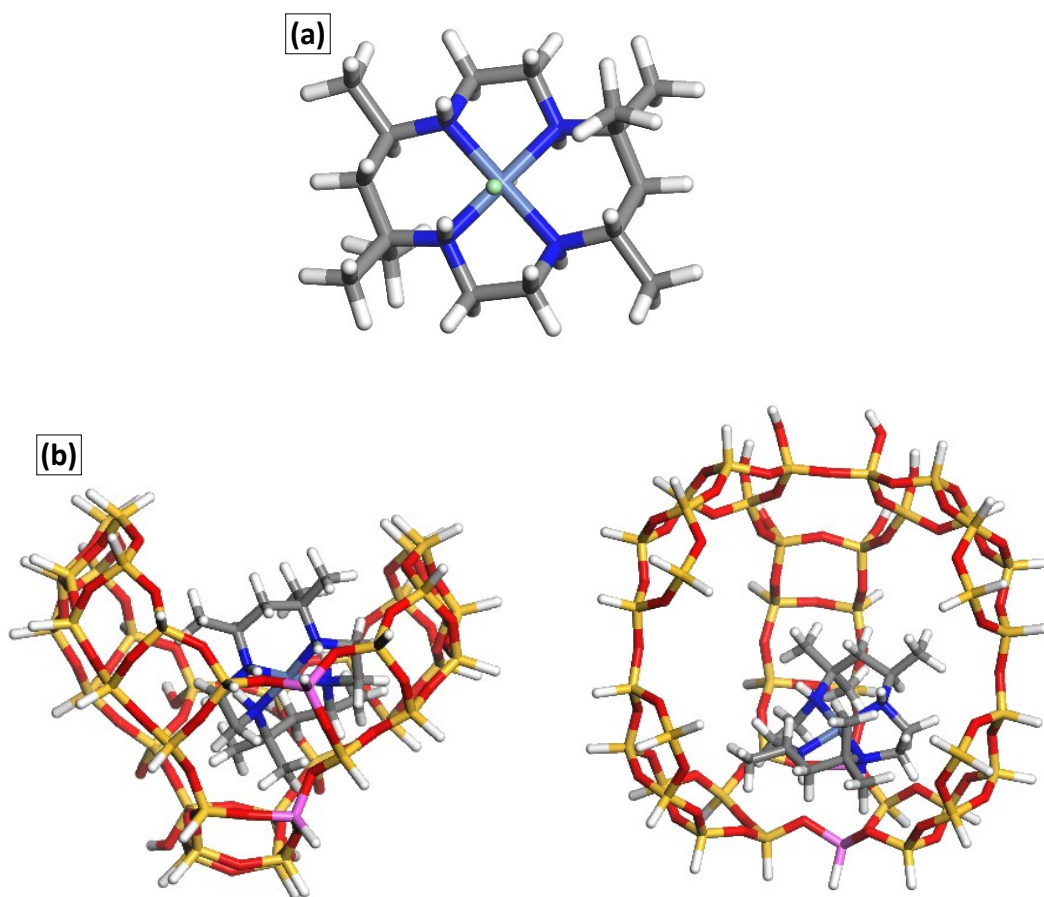

**Figure S.4** DFT Optimized structure of (a) Nickel(II)tet-a complex (NT) and (b) Nickel(II)tet-a complex in Y (NTY).
